# Supplementary material
Source: MDPI journal article supplement (https://www.mdpi.com/2076-3417/8/1/87)
Supplement: s1 [file s1]

# Supplementary Materials: Low-Dimensional Reconciliation for Continuous-Variable Quantum Key Distribution

Laszlo Gyongyosi and Sandor Imre

## S.1. Preliminaries

### S.1.1. Spherical Code

A  $d$ -dimensional spherical code  $\mathcal{X}$  is defined over the  $d$ -dimensional unit sphere  $\Gamma^{d-1}$ , given by  $\Gamma^{d-1} = \{x = (x_0, x_1, \dots, x_{d-1}) \in \mathbb{R}^d : \|x\| = 1\}$ , and  $\|x\| = 1$  is the unit norm. The  $(d-1)$ -dimensional surface  $S(\Gamma^{d-1})$  of  $\Gamma^{d-1}$  is defined as  $S(\Gamma^{d-1}) = 2\pi^{d/2}/\mathcal{G}(d/2)$ , where  $\mathcal{G}(d/2) = \int_0^\infty t^{(d/2)-1} e^{-t} dt$  is the gamma function [24]. The number of codewords of the code is  $|\mathcal{X}|$ , the smallest dimension  $d_{\min}$  of any Euclidean space for the spherical code  $\mathcal{X}$  is  $d_{\min} = \dim|\mathcal{X}|$ , while the minimum distance between any two elements  $x$  and  $y$  of  $\mathcal{X} \subseteq \Gamma^{d-1}$ ,  $x \neq y$ , is  $D = \min\{\|x - y\|^2\}$ .

### S.1.2. Gaussian Random Spherical Vectors

Let  $\mathfrak{X} = (X_0, \dots, X_{d-1})^T \in \mathbb{R}^d$  be a Gaussian random vector with independent components, and with norm  $\|\mathfrak{X}\|$  drawn from an  $\mathbb{N}(0, \sigma^2)$  memoryless Gaussian source. Over the  $d$ -dimensional unit sphere  $\Gamma^{d-1}$ , spherical Gaussian random vector  $\mathbb{E}[\|\mathfrak{X}\|](\mathfrak{X}/\|\mathfrak{X}\|) \in \Gamma^{d-1} \in \mathbb{R}^d$  has radius  $r = \mathbb{E}\|\mathfrak{X}\|$ , where  $\mathbb{E}$  is the mean of the norm  $\|\mathfrak{X}\|$ , defined [24] as

$$\mathbb{E}[\|\mathfrak{X}\|] = \frac{\sqrt{2\sigma^2} \mathcal{G}(\frac{d+1}{2})}{\mathcal{G}(\frac{d}{2})} = \frac{\sqrt{2\pi\sigma^2}}{\beta(\frac{d}{2}, \frac{1}{2})} \quad (1)$$

where  $\beta(x, y) = \frac{\mathcal{G}(x)\mathcal{G}(y)}{\mathcal{G}(x+y)}$ , is the beta function, while  $\mathbb{E}[\|\mathfrak{X}\|^2] = d\sigma^2$ . The Gaussian random vector  $\mathfrak{X} \in \mathbb{R}^d$  over  $\Gamma^{d-1}$  has a probability density function

$$f(\mathfrak{X}) = \frac{e^{-\frac{r^2}{2\sigma^2}}}{\mathcal{G}(\frac{d}{2}) (2\sigma^2)^{d/2}}, \quad (2)$$

and variance

$$\text{var}[\mathfrak{X}] = d\sigma^2 - \frac{2\pi\sigma^2}{\beta^2(\frac{d}{2}, \frac{1}{2})} \quad (3)$$

For  $d \rightarrow \infty$ ,  $\mathbb{E}[\|\mathfrak{X}/\sqrt{d\sigma^2}\|] \rightarrow 1$ , and  $r = \lim_{d \rightarrow \infty} \|\mathfrak{X}/\sqrt{d\sigma^2}\| \rightarrow 1$ . The distribution of  $r$  approximates the Dirac distribution  $\mathcal{D}_d(x)$ , and gets to arbitrary close for  $d \rightarrow \infty$ .

## S.2. Notations

The notations of the manuscript are summarized in Table S1.

**Table S1.** Summary of the notations.

| Notation                                                                                                                                                                                             | Description                                                                                                                                                                                                                                  |
|------------------------------------------------------------------------------------------------------------------------------------------------------------------------------------------------------|----------------------------------------------------------------------------------------------------------------------------------------------------------------------------------------------------------------------------------------------|
| $ \varphi_i\rangle =  x_{A,i} + x'_{B,i} + i(p_{A,i} + p'_{B,i})\rangle$                                                                                                                             | The first mode of the combined beam, phase space vector, where $x_{A,i}, x'_{B,i}$ and $p_{A,i}, p'_{B,i}$ are the position and momentum quadratures.                                                                                        |
| $ \phi_i\rangle =  x_{A,i} - x'_{B,i} + i(p_{A,i} - p'_{B,i})\rangle$                                                                                                                                | The second mode of the combined beam, phase space vector, transmitted to Bob, where $x_{A,i}, x'_{B,i}$ and $p_{A,i}, p'_{B,i}$ are the position and momentum quadratures.                                                                   |
| $ \xi_i\rangle =  x'_{A,i} - x''_{B,i} + i(p'_{A,i} - p''_{B,i})\rangle$                                                                                                                             | The noisy version of phase space state $ \phi_i\rangle$ , with the noisy quadratures.                                                                                                                                                        |
| $X$                                                                                                                                                                                                  | Alice's $N$ -unit length raw data generated by $N$ random quadrature measurements. Binary string, consists of $N/d$ number of $d$ -dimensional Gaussian random vectors $\mathbf{X}_j \in \mathbb{R}^d$ .                                     |
| $X'$                                                                                                                                                                                                 | Bob's $N$ -unit length raw data generated by $N$ random quadrature measurements. Binary string, consists of $N/d$ number of noisy $d$ -dimensional Gaussian random vectors $\mathbf{X}'_j \in \mathbb{R}^d$ .                                |
| $X_i = x_{A,i} + x'_{B,i},$<br>$X_i = p_{A,i} + p'_{B,i}$                                                                                                                                            | Alice's raw data <i>unit</i> , obtained from a random quadrature measurement, where $x_{A,i}, x'_{B,i}$ and $p_{A,i}, p'_{B,i}$ are the position and momentum quadratures.                                                                   |
| $X'_i = x'_{A,i} + x''_{B,i},$<br>$X'_i = p'_{A,i} + p''_{B,i}$                                                                                                                                      | Bob's noisy raw data <i>unit</i> , obtained from a random quadrature measurement and by a correction $+2x_{B,i}$ or $+2p_{B,i}$ , while $x'_{A,i}, x''_{B,i}$ and $p'_{A,i}, p''_{B,i}$ are the noisy position and momentum quadratures.     |
| $\mathbf{X}_j \in \mathbb{R}^d : \{X_{j,0}, X_{j,1}, \dots, X_{j,d-1}\}$                                                                                                                             | Alice's $d$ -dimensional Gaussian random <i>vector</i> ( $d$ unit length Gaussian random vector), where $X_{j,i}$ is a Gaussian random variable.                                                                                             |
| $X_{j,i} \in \mathbb{R}, X'_{j,i} \in \mathbb{R}$                                                                                                                                                    | The $i$ -th unit of $j$ -th vector $\mathbf{X}_j$ and $\mathbf{X}'_j$ .                                                                                                                                                                      |
| $\mathbf{X}'_j \in \mathbb{R}^d : \{X'_{j,0}, X'_{j,1}, \dots, X'_{j,d-1}\}$                                                                                                                         | Bob's noisy $d$ -dimensional Gaussian random <i>vector</i> ( $d$ unit length vector), where $X'_{j,i} = x'_{A,i} + x''_{B,i}$ or $X'_{j,i} = p'_{A,i} + p''_{B,i}$ is a Gaussian random <i>units</i> obtained from a quadrature measurement. |
| $\mathbf{K} = \{\mathbf{U}_0, \dots, \mathbf{U}_{(N/d)-1}\} \in \mathbb{R}^{N/d},$<br>$\mathbf{U}_j = \{U_{j,0}, U_{j,1}, \dots, U_{j,d-1}\} \in \mathbb{R}^d,$<br>$U_j \in \{a, b\} \in \mathbb{R}$ | Bob's secret key vector. The full key is granulated into $N/d$ number of $\mathbf{U}_j \in \mathbb{R}^d$ vectors.                                                                                                                            |
| $\mathbf{X}'_j \mathbf{U}_j \in \mathbb{R}^d$                                                                                                                                                        | Bob's $d$ -dimensional vector sent to the classical channel.                                                                                                                                                                                 |
| $X'_{j,i} U_{j,i} \in \mathbb{R}$                                                                                                                                                                    | A unit of Bob's $d$ -dimensional message sent to the classical channel.                                                                                                                                                                      |
| $C(\cdot)$                                                                                                                                                                                           | The Gaussian CDF function.                                                                                                                                                                                                                   |
| $\mathfrak{C}(\cdot)$                                                                                                                                                                                | Covariance matrix.                                                                                                                                                                                                                           |
| $\mathcal{D}_d(\cdot)$                                                                                                                                                                               | Dirac distribution of a $d$ -dimensional vector.                                                                                                                                                                                             |
| $\mathcal{L}$                                                                                                                                                                                        | Lyapunov coefficient, $\mathcal{L} > 0$ .                                                                                                                                                                                                    |

|                                                                                                          |                                                                                                            |
|----------------------------------------------------------------------------------------------------------|------------------------------------------------------------------------------------------------------------|
| $U'_j = \sum_{i=0}^{d-1} U'_{j,i},$ $U'_{j,i} = \left( C(X'_{j,i}) U_{j,i} \right) \frac{1}{C(X_{j,i})}$ | The noisy version of Bob's secret $U_j$ , and its unit $U_{j,i}$ .                                         |
| $\delta_j, \delta_{j,i}$                                                                                 | Noise on $U'_j = \sum_{i=0}^{d-1} U'_{j,i}$ , and on unit $U_{j,i}$ .                                      |
| $\eta = \sqrt{\left( \sigma_{\delta_j}^2 \right)_d}$                                                     | Standard deviation of the noise vector $\vec{\delta}_j$ .                                                  |
| $\Lambda_j = \mathbb{N}(0,1)_d \in \mathbb{R}^d, \Lambda_{j,i} = \mathbb{N}(0,1) \in \mathbb{R}$         | Standard Gaussian random noise vector, and the noise of the $i$ -th unit of the $j$ -th block $X_{j,i}$ .  |
| $\Delta_j = \mathbb{N}(0, \sigma_2^2)_d \in \mathbb{R}^d$                                                | Gaussian random noise vector of the quantum channel $\mathcal{N}_2$ on $\mathbf{X}_j$ .                    |
| $\Delta_{j,i} = \mathbb{N}(0, \sigma_2^2) \in \mathbb{R}$                                                | The $i$ -th unit of $j$ -th noise vector, that results raw data unit $X'_{j,i} = X_{j,i} + \Delta_{j,i}$ . |

### S.3. Abbreviations

|       |                                                 |
|-------|-------------------------------------------------|
| AWGN  | Additive White Gaussian Noise                   |
| BAWGN | Binary Additive White Gaussian Noise            |
| BS    | Beam Splitter                                   |
| BSC   | Binary Symmetric Channel                        |
| CDF   | Cumulative Distribution Function                |
| CLT   | Central Limit Theorem                           |
| CV    | Continuous-Variable                             |
| DPR   | Differential Phase Reference                    |
| DV    | Discrete-Variable                               |
| LDPC  | Low Density Parity Check                        |
| PM    | Prepare-and-Measure: entanglement-free protocol |
| RR    | Reverse Reconciliation                          |
| SNR   | Signal-to-Noise Ratio                           |
